# Supplementary material for: Ecosystem resilience despite large-scale altered hydroclimatic conditions
Source: Springer Nature journal article supplement (doi:10.1038/nature11836), 2013-01-18
Supplement: 41586_2013_BFnature11836_MOESM225_ESM.pdf [file 41586_2013_BFnature11836_MOESM225_ESM.pdf]

**Experimental Sites.** We based our study on a decadal (2000–2009) dataset of MODIS Enhanced Vegetation Index (EVI) and precipitation from 12 United States Department of Agriculture (USDA) long-term experimental sites in the conterminous United States and Puerto Rico and 17 similar sites in the Australian continent. The experimental sites encompass a range of precipitation regimes and capture similar biome types on both continents (Table 1). Results for USDA<sub>00-09</sub> and Australia<sub>01-09</sub> sites were compared with previously-published results based on a dataset composed primarily of Long-term Ecological Research (LTER) sites covering 14 sites with measurements made during the period from about 1975–1998, hereafter referred to as the LTER<sub>75-98</sub> dataset (Table 1; Figures 1–4). To validate the relation between annually integrated EVI (iEVI) and annual above-ground net primary production (ANPP) for the dataset in this study, *in situ* estimates of ANPP (ANPP<sub>G</sub>) during the period 2000–2009 were compiled for 10 sites across the United States (Table 2), resulting in the analysis presented in Figure 1 in the main text. Three of these sites were used to validate results (LTER<sub>00-09</sub>, Table 1). The Palmer Drought Severity Index (PDSI, see Methods) indicated drought duration and severity at these sites during the 2000–2009 study period (Table 3).

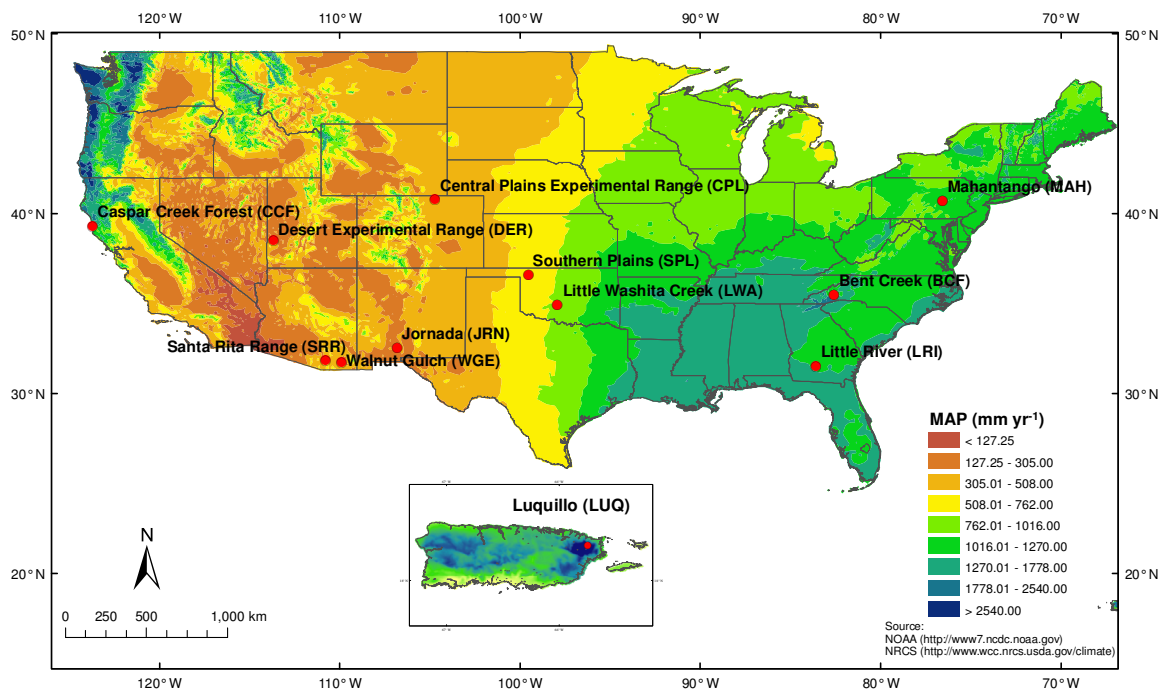

**Figure 1.** Location of the USDA<sub>00-09</sub> experimental sites with mean annual precipitation (MAP).

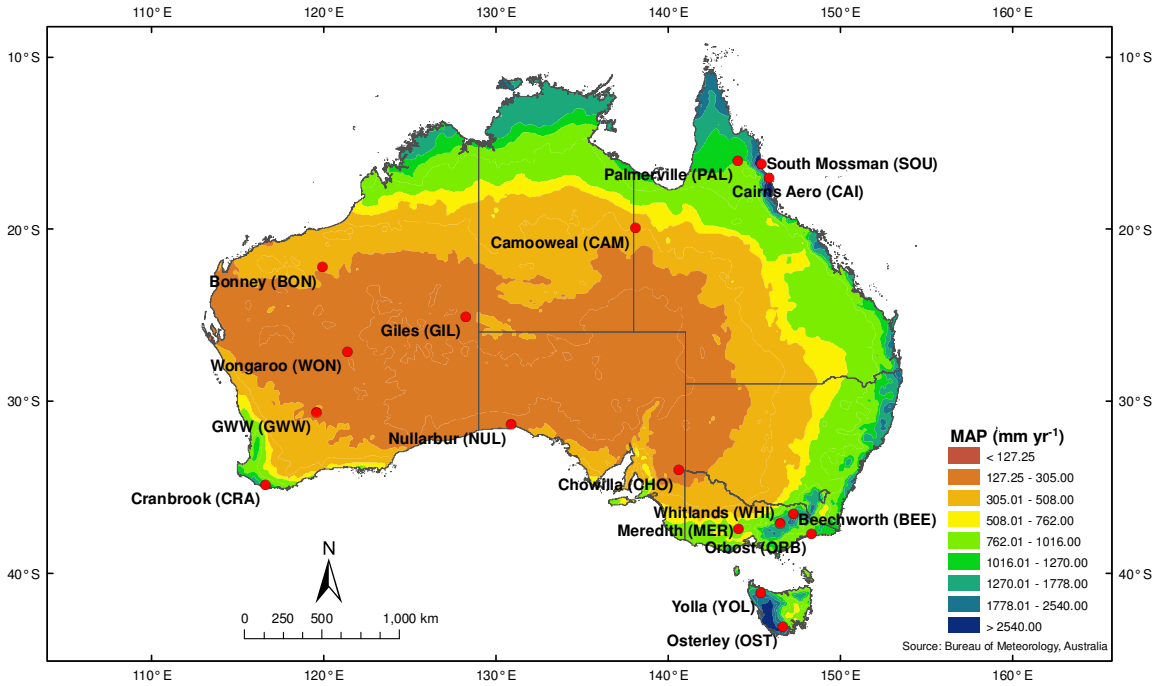

**Figure 2.** Location of the Australia<sub>01-09</sub> experimental sites with mean annual precipitation (MAP).

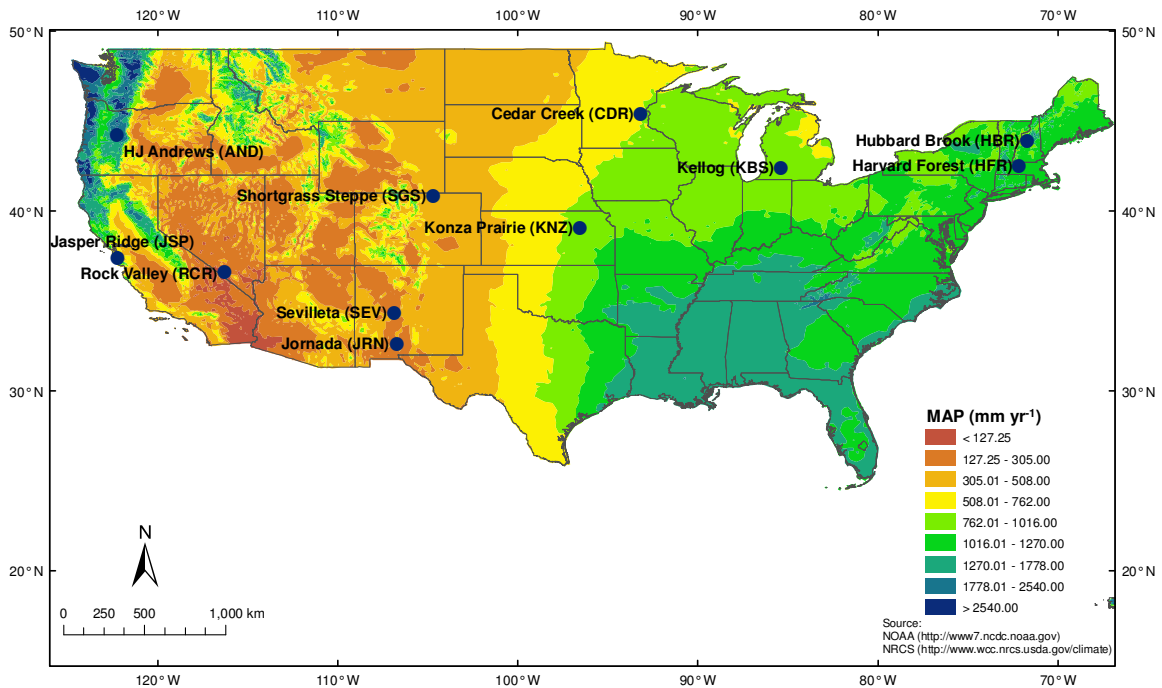

**Figure 3.** Location of the LTER<sub>75-98</sub> experimental sites with mean annual precipitation (MAP). Sites not shown in this map of the conterminous United States are Bonanza Creek (BNZ) in Alaska, Patagonia Steppe (PSA) in Argentina, and Barro Colorado Island (BCI) in Republic of Panama.



**Table 1.** Characteristics of the sites in the LTER<sub>75-98</sub>, USDA<sub>00-09</sub>, Australia<sub>01-09</sub>, and LTER<sub>00-09</sub> datasets, including dominant biome type, site name abbreviation and mean annual precipitation (MAP, mm yr<sup>-1</sup>) during the study period. Site names and locations are given in Figures 1-3 and by studies using the LTER<sub>75-98</sub> dataset<sup>2,3</sup>. Sites in the LTER<sub>75-98</sub> dataset used in studies of rain-use efficiency<sup>2</sup> were designated with “\*”, those used in studies of production responses to extreme precipitation pulses<sup>3</sup> were designated with “§” and the sites in the LTER network are designated with “+”.

| <i>Dominant Biome type</i> | LTER <sub>75-98</sub> |                                 | USDA <sub>00-09</sub> |                                 | Australia <sub>01-09</sub> |                                 | LTER <sub>00-09</sub> |                                 |
|----------------------------|-----------------------|---------------------------------|-----------------------|---------------------------------|----------------------------|---------------------------------|-----------------------|---------------------------------|
|                            | <i>Abbr.</i>          | <i>MAP (mm yr<sup>-1</sup>)</i> | <i>Abbr.</i>          | <i>MAP (mm yr<sup>-1</sup>)</i> | <i>Abbr.</i>               | <i>MAP (mm yr<sup>-1</sup>)</i> | <i>Abbr.</i>          | <i>MAP (mm yr<sup>-1</sup>)</i> |
| <b>Grass</b>               | RCR*                  | 106                             | DER                   | 164                             | BON                        | 428                             | JRN                   | 242                             |
|                            | JRN <sup>+*§</sup>    | 263                             | JRN                   | 260                             | CAM                        | 442                             | SGS                   | 330                             |
|                            | SEV <sup>+*§</sup>    | 269                             | WGE                   | 281                             |                            |                                 | CDR                   | 538                             |
|                            | SGS <sup>+*§</sup>    | 359                             | CPL                   | 330                             |                            |                                 |                       |                                 |
|                            | CDR <sup>+*§</sup>    | 826                             | SPL                   | 610                             |                            |                                 |                       |                                 |
|                            | KNZ <sup>+*§</sup>    | 834                             | LWA                   | 761                             |                            |                                 |                       |                                 |
|                            | JSP*                  | 922                             |                       |                                 |                            |                                 |                       |                                 |
| <b>Shrub</b>               | PSA*                  | 162                             | SRR                   | 327                             | CHO                        | 211                             |                       |                                 |
|                            | KBS <sup>+*§</sup>    | 866                             |                       |                                 | WON                        | 265                             |                       |                                 |
|                            |                       |                                 |                       |                                 | NUL                        | 283                             |                       |                                 |
|                            |                       |                                 |                       |                                 | GIL                        | 320                             |                       |                                 |
|                            |                       |                                 |                       |                                 | GWV                        | 322                             |                       |                                 |
| <b>Forest</b>              | BNZ <sup>+*§</sup>    | 343                             | LRI                   | 967                             | OST                        | 455                             |                       |                                 |
|                            | HFR <sup>+*§</sup>    | 1196                            | CCF                   | 1049                            | MER                        | 591                             |                       |                                 |
|                            | HBR <sup>+*§</sup>    | 1413                            | MAH                   | 1129                            | CRA                        | 709                             |                       |                                 |
|                            | AND <sup>+*</sup>     | 2131                            | BCF                   | 1297                            | ORB                        | 753                             |                       |                                 |
|                            | BCI*                  | 2543                            | LUQ                   | 3772                            | BEE                        | 811                             |                       |                                 |
|                            |                       |                                 |                       |                                 | PAL                        | 1105                            |                       |                                 |
|                            |                       |                                 |                       |                                 | WHI                        | 1131                            |                       |                                 |
|                            |                       |                                 |                       |                                 | YOL                        | 1267                            |                       |                                 |
|                            |                       |                                 |                       |                                 | CAI                        | 1830                            |                       |                                 |
|                            |                       |                                 |                       | SOU                             | 2245                       |                                 |                       |                                 |

**Table 2.** Sites with ANPP field measurements available within the 2000-2009 period.

| <b>Site</b>                               | <b>Biome and Location</b>              | <b>Period</b>           |
|-------------------------------------------|----------------------------------------|-------------------------|
| Jornada (JRN)                             | Semiarid Grassland, New Mexico         | 2000-2008 <sup>a</sup>  |
| Sevilleta (SEV)                           | Semiarid Grassland, New Mexico         | 2002-2003 <sup>a</sup>  |
| Shortgrass Steppe (SGS)                   | Mesic Grassland, Colorado              | 2000-2009 <sup>a</sup>  |
| Cedar Creek (CDR)                         | Mesic Grassland, Minnesota             | 2000-2007 <sup>a</sup>  |
| Konza Prairie (KNZ)                       | Mesic Grassland, Kansas                | 2000-2002 <sup>a</sup>  |
| Harvard Forest (HFR)                      | Mixed Forest, Massachusetts            | 2000-2006 <sup>a</sup>  |
| Metolius Intermediate Pine                | Evergreen Needle-leaf Forest, Oregon   | 2001 <sup>b</sup>       |
| Park Falls                                | Deciduous Broad-leaf Forest, Wisconsin | 2000, 2004 <sup>b</sup> |
| Ohio Hills Fire and Fire Surrogate        | Mixed Forest, Ohio                     | 2001-2002 <sup>4</sup>  |
| University of Michigan Biological Station | Deciduous broadleaf forest, Michigan   | 2000-2006 <sup>5</sup>  |

**a-** <http://www.lternet.edu/site/> **b-** <http://public.ornl.gov/ameriflux/>

**Table 3.** PDSI annual averages for USDA<sub>00-09</sub> and Australia<sub>01-09</sub> sites during the period 2000-2009, where cells with PDSI < 0 are shaded.

| <b>USDA</b>      |             |             |             |             |             |             |             |             |             |             |
|------------------|-------------|-------------|-------------|-------------|-------------|-------------|-------------|-------------|-------------|-------------|
| <b>Sites</b>     | <b>2000</b> | <b>2001</b> | <b>2002</b> | <b>2003</b> | <b>2004</b> | <b>2005</b> | <b>2006</b> | <b>2007</b> | <b>2008</b> | <b>2009</b> |
| DER              | -1.75       | -1.75       | -3.42       | -3.21       | -2.93       | 0.48        | -0.37       | -0.47       | -0.09       | -0.35       |
| JRN              | -0.03       | -0.30       | -2.08       | -2.14       | -1.26       | 1.13        | -1.28       | 4.25        | 3.02        | 2.26        |
| WGE              | -1.53       | -0.43       | -1.80       | -2.59       | -0.28       | -0.43       | -2.76       | 0.48        | -0.60       | -0.46       |
| SRR              | -1.23       | 0.77        | -2.94       | -2.82       | -3.32       | -3.19       | -3.65       | -3.04       | -1.66       | -2.26       |
| CPL              | -1.22       | -1.04       | -2.18       | -2.84       | -3.54       | -2.60       | -2.53       | -2.71       | -1.86       | 1.45        |
| SPL              | 1.56        | -0.12       | -1.69       | 0.02        | 0.85        | 1.98        | -1.38       | 0.53        | -0.33       | -0.39       |
| LWA              | -3.17       | -2.47       | -3.22       | -3.29       | -3.64       | -3.12       | -3.24       | 1.43        | 2.29        | 1.31        |
| LRI              | -1.63       | -0.47       | -2.19       | 0.91        | -0.23       | 0.94        | -2.21       | -3.88       | -3.32       | -2.59       |
| CCF              | 2.56        | -1.48       | -1.72       | -0.07       | -1.44       | 0.00        | 1.26        | -1.79       | -2.26       | -3.39       |
| MAF              | -1.59       | -2.09       | -3.65       | 1.71        | 2.89        | 3.33        | 2.47        | 2.21        | 2.29        | 1.86        |
| BCF              | -1.22       | -1.34       | -1.33       | 2.29        | 2.75        | 2.93        | 3.35        | -0.20       | -1.99       | -0.15       |
| LUQ              | -0.52       | -2.63       | -2.03       | -0.78       | 0.93        | 3.69        | 2.65        | -1.16       | -0.70       | 0.19        |
| <b>Australia</b> |             |             |             |             |             |             |             |             |             |             |
| <b>Sites</b>     | <b>2000</b> | <b>2001</b> | <b>2002</b> | <b>2003</b> | <b>2004</b> | <b>2005</b> | <b>2006</b> | <b>2007</b> | <b>2008</b> | <b>2009</b> |
| CHO              | 0.07        | -2.13       | -1.78       | -0.17       | -2.07       | -0.38       | -1.89       | -2.85       | -3.51       | -2.63       |
| WON              | 3.93        | 3.01        | -0.33       | -0.36       | 0.38        | -0.27       | 1.82        | -1.40       | -2.57       | -3.37       |
| NUL              | -1.81       | 1.08        | -1.00       | -0.62       | -0.55       | 0.02        | -0.03       | -1.87       | -3.48       | -2.79       |
| GIL              | 3.22        | 3.84        | -1.89       | 0.58        | -0.41       | 1.42        | 0.12        | -1.45       | -2.22       | -2.10       |
| GWV              | 3.13        | -1.29       | -1.77       | 1.26        | 1.27        | 1.18        | -1.15       | -2.89       | -1.97       | -2.99       |
| BON              | 4.36        | 2.52        | -0.97       | -2.08       | -2.65       | 0.35        | 2.41        | -1.47       | 0.21        | -0.56       |
| CAM              | 2.48        | -2.88       | -3.68       | -3.48       | -2.97       | -0.80       | -0.27       | -1.70       | -0.58       | 2.46        |
| OST              | -2.22       | 0.50        | -1.39       | -0.28       | -1.40       | -0.56       | -1.95       | -3.05       | -3.64       | 1.99        |
| MER              | 0.08        | 0.44        | -1.31       | -0.82       | 0.64        | -1.03       | -2.88       | -3.06       | -3.77       | -2.38       |
| CRA              | -2.23       | -3.63       | -3.71       | -2.96       | NA          | -2.29       | -2.55       | -2.85       | -3.14       | -2.45       |
| ORB              | -0.55       | 0.48        | -1.82       | -3.36       | -3.88       | -2.84       | -3.29       | -2.96       | -3.42       | -3.60       |
| BEE              | 2.58        | 0.80        | -2.03       | -2.08       | -0.69       | -0.11       | -3.20       | -3.86       | -2.97       | -3.20       |
| PAL              | -0.35       | -0.16       | -0.78       | -1.99       | -1.46       | -2.03       | 3.30        | 4.06        | 3.84        | 2.27        |
| WHI              | 2.90        | 0.98        | -1.72       | -0.03       | 0.69        | 0.87        | -3.02       | -3.14       | -3.09       | -2.78       |
| YOL              | -0.98       | -1.50       | -1.49       | 0.52        | -0.54       | 0.52        | -2.88       | -3.65       | -3.61       | -3.77       |
| CAI              | 0.82        | -1.35       | -2.87       | -3.02       | -3.78       | -2.32       | 0.82        | -0.24       | -1.52       | -2.74       |
| SOU              | 2.14        | -1.13       | -1.52       | -1.99       | -3.12       | -4.27       | -2.58       | -2.15       | -3.23       | -4.02       |

## References

1. Jenerette, G. D., Barron-Gafford, G. A., Guswa, A. J., McDonnell, J. J. & Villegas, J. C. Organization of complexity in water limited ecohydrology. *Ecohydrology* (2011).doi:10.1002/eco.217
2. Huxman, T. E. *et al.* Convergence across biomes to a common rain-use efficiency. *Nature* **429**, 651–654 (2004).
3. Knapp, A. K. & Smith, M. D. Variation among biomes in temporal dynamics of aboveground primary production. *Science* **291**, 481–484 (2001).
4. Chiang, J.-M., McEwan, R. W., Yaussy, D. A. & Brown, K. J. The effects of prescribed fire and silvicultural thinning on the aboveground carbon stocks and net primary production of overstory trees in an oak-hickory ecosystem in southern Ohio. *Forest Ecol. Manag.* **255**, 1584–1594 (2008).
5. Gough, C. M., Vogel, C. S., Schmid, H. P., Su, H.-B. & Curtis, P. S. Multi-year convergence of biometric and meteorological estimates of forest carbon storage. *Agr. Forest Meteorol.* **148**, 158–170 (2008).
